# Supplementary material for: An Integrated View of Whole-Tree Hydraulic Architecture. Does Stomatal or Hydraulic Conductance Determine Whole Tree Transpiration?
Source: PLoS One. 2016 May 25;11(5):e0155246. doi: 10.1371/journal.pone.0155246 (PMC4880183; doi:10.1371/journal.pone.0155246)
Supplement: S1 Table — (XLSX) [file pone.0155246.s001.xlsx]

## Sheet: Hoja1
S1 Table. Number of leaves, dry weight of stem, leaves and root, leave surface and shoot, root and plant hydraulic conductance of the sixteen plants of Cleopatra Mandarin and Poncirus trifoliata used in the experiment
plant	number of leaves	stem dry weight	leaves dry weight	root dry weight	leave surface	Kshoot	Kroot	Kplant	Tp
		g	g	g	m2	*10-7 kg Mpa-1 s-1 g-1	*10-7 kg Mpa-1 s-1 g-1	*10-7 kg Mpa-1 s-1 g-1	g day-1
CM 1	23	3.1	1.8	1.4	0.0100503	21.2	20.2	10.344	30
CM 2	21	0.57	2.11	0.7584	0.0117811	32	29	15.2131	29.4
CM 3	33	2	2.91	2.44	0.0162479	33.4	33.4	16.7	34
CM 4	45	5.48	5.68	2.04	0.0317141	40	34.4	18.4946	38.2
CM 5	45	4.6	4.1	3.01	0.0228922	49.4	39.4	21.9185	36.05
CM 6	44	4.62	5.14	3.89	0.0286991	45.9	40.6	21.5438	39.5
CM 7	49	2.6	5.83	2.0254	0.0325516	44.2	45.6	22.4445	35.9
CM 8	48	5.21	7.62	4.48	0.0425461	59.2	50.6	27.2816	39.7
CM 9	65	8.5	9.01	6.06	0.0503071	58.2	56.1	28.5654	38.1
CM 10	41	3.2	3.65	3.04	0.0203797	60.2	60.5	30.1748	38.9
CM 11	49	4.69	6.17	4.3113	0.03445	64.3	67.7	32.9781	39.05
CM 12	39	2.9	3.18	3.16	0.0177554	62.4	71.1	33.2333	35.5
CM 13	63	9.01	9.4	5.59	0.0524846	76.2	78	38.5447	45.01
CM 14	74	10.2	8.03	6.04	0.0448353	79.8	80.1	39.9749	43.01
CM 15	77	11.81	10.82	7.2491	0.0604132	80	88.7	42.0628	45.85
CM 16	28	3.66	5.16	3.39	0.0288107	52.6	50.5	25.7643	41
PT 1	27	4.6	1	1.95681	0.00529101	20.3	45.5	14.0372	32.8
PT 2	21	4	0.62	1.69	0.00328042	17.6	50.7	13.0647	32.6
PT 3	36	3.75	1.5	2.09	0.00793651	34.8	65.5	22.7258	37.4
PT 4	22	4.2	0.54	2.45	0.00285714	21.4	75.6	16.6788	32.1
PT 5	42	5.88	1.39	3.038	0.0073545	44.7	76.3	28.1869	40.1
PT 6	35	4.87	0.98	3.29	0.00518519	27.2	86.4	20.6873	34.7
PT 7	38	1.79	2.31	3.7	0.0122222	47.2	86.8	30.5743	41.1
PT 8	25	1.99	0.62	3.82	0.00328042	40.4	96.3	28.4603	36.1
PT 9	61	8.52	2.6	3.14	0.0137566	40.2	100.6	28.7224	42.1
PT 10	49	7.3	2.03	4.4	0.0107407	36.1	120	27.7514	41.5
PT 11	59	10.94	2.74	3.8542	0.0144974	47.8	126	34.6536	42.7333
PT 12	27	3.82	2.12	5.39	0.0112169	56.6	142.1	40.4774	45.2
PT 13	40	11.18	2.62	4.78	0.0138624	42.8	150.2	33.3086	46.2
PT 14	30	3.19	1.73	5.14	0.00915344	54.4	159	40.5323	43.4
PT 15	55	12.82	1.91	5.666	0.0101058	54	146	39.42	45.8
PT 16	47	7.89	1.79	4.75	0.0094709	46.5	137.5	34.7486	41.5
